# Supplementary material for: Benzothiazolyl substituted iminothiazolidinones and benzamido-oxothiazolidines as potent and partly selective aldose reductase inhibitors
Source: Royal Society of Chemistry journal article supplement (doi:10.1039/c4md00206g), 2014-01-01

**Benzothiazolyl Substituted Iminothiazolidinones and Benzamido-oxothiazolidines as Potent  
and Selective Aldose Reductase Inhibitors**

**Aamer Saeed<sup>a</sup>, Yildiz Tehseen<sup>b</sup>, Hummera Rafique<sup>a</sup>, Norbert Furtmann<sup>c,d</sup>, Jürgen Bajorath<sup>c</sup>,  
Ulrich Flörke<sup>e</sup> and Jamshed Iqbal<sup>b\*</sup>**

<sup>a</sup> Department of Chemistry, Quaid-i-Azam University, Islamabad, Pakistan

<sup>b</sup> Centre for Advanced Drug Research, COMSATS Institute of Information Technology,  
Abbottabad, Postal Code 22060, Pakistan

<sup>c</sup> Department of Life Science Informatics, B-IT, LIMES Program Unit Chemical Biology and  
Medicinal Chemistry, Rheinische Friedrich-Wilhelms-Universität, Dahlmannstr. 2, D-53113  
Bonn, Germany.

<sup>d</sup> Pharmaceutical Institute, University of Bonn, An der Immenburg 4, D-53121 Bonn, Germany

<sup>e</sup> Department Chemie, Fakultät für Naturwissenschaften, Universität Paderborn,  
Warburgerstrasse 100, D-33098 Paderborn, Germany

**Methyl-2-[3-(benzo[d]thiazol-2-yl)-2-(4-methylbenzamido)-4-oxo-thiazolidin-5-  
ylidene]acetate (2c)**

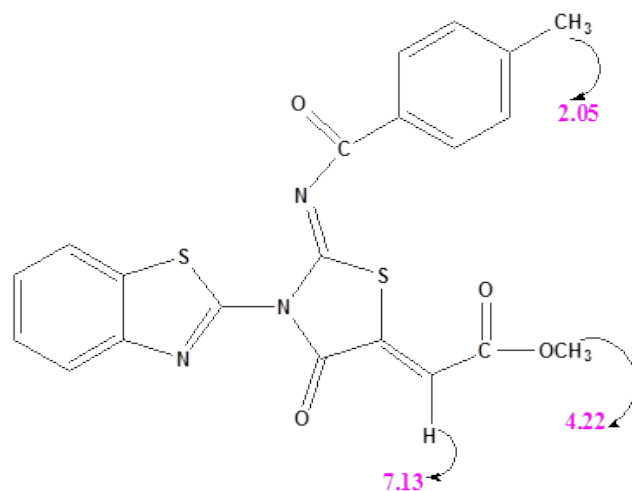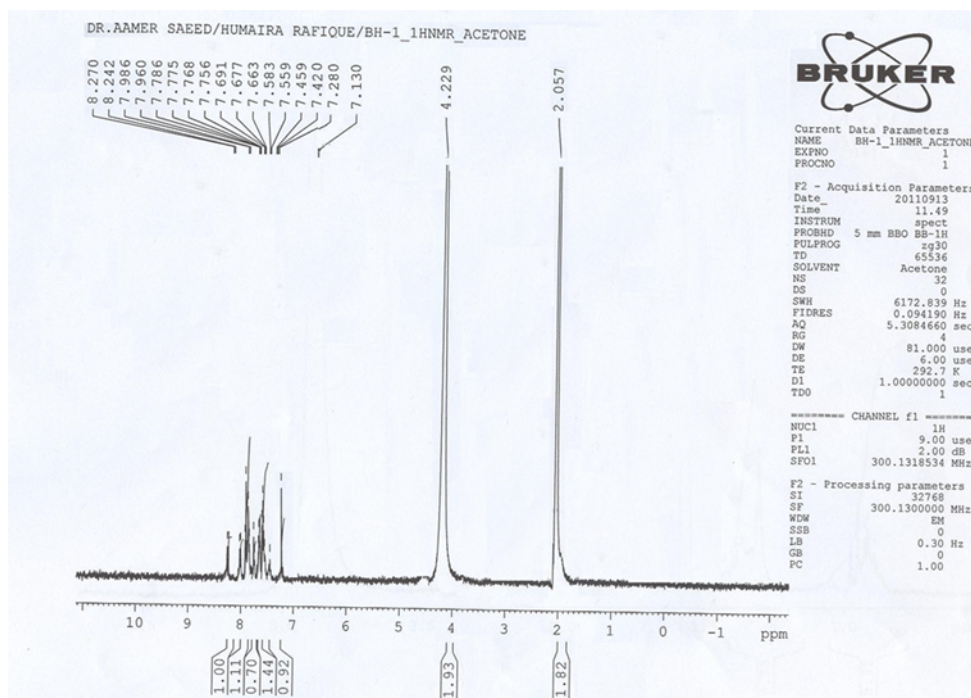

**Ethyl 4-[5-(2-methoxy-2-oxoethylidene)-2-(4-methylbenzamido)-4-oxo-thiazolidin-3-yl]benzoate (3d)**

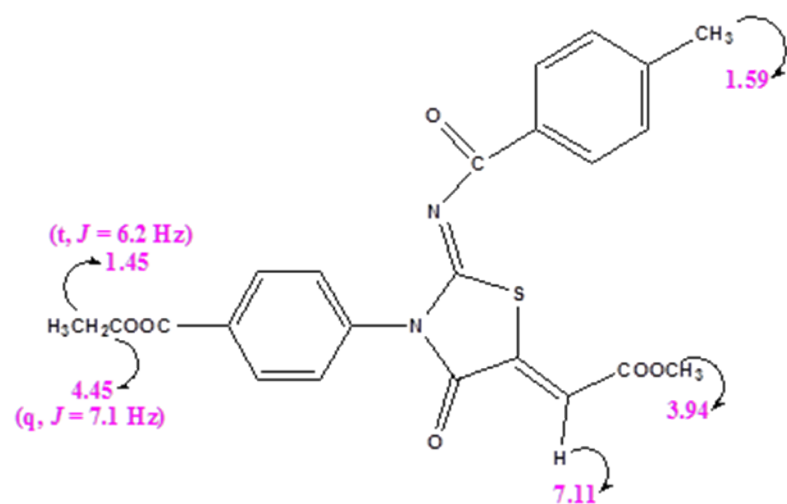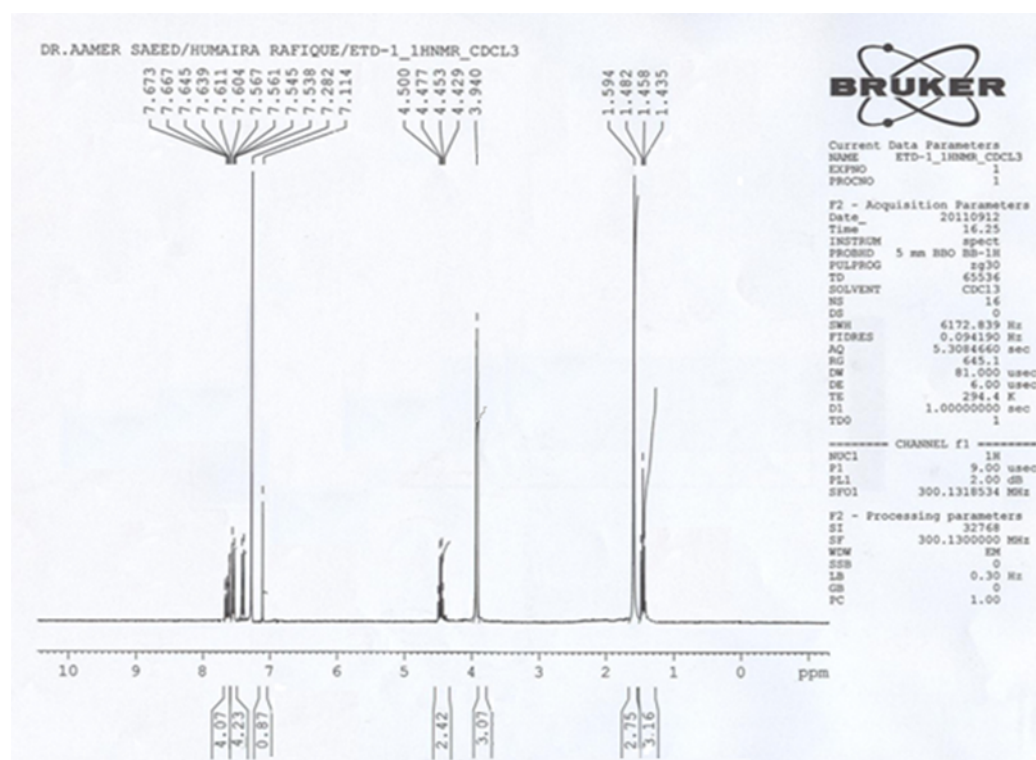

Supplement: c4md00206g1.pdf [file c4md00206g1.pdf]
